# Supplementary material for: Cosuppression of NF-κB and AICDA Overcomes Acquired EGFR-TKI Resistance in Non-Small Cell Lung Cancer
Source: MDPI journal article supplement (doi:10.3390/cancers14122940), 2022-06-14
Supplement: s1 [file s1]

Supplementary tables

**Table S1.** Detailed information for primers

| Gene          | Primer sequence (5'-3')                          | Size (bp) | NCBI reference |
|---------------|--------------------------------------------------|-----------|----------------|
| Interleukin-6 | 5'-AGACAGCCCACTCACCTCTTCA-3'                     | 132       | NM_000600.5    |
| Interleukin-6 | IL6 reverse, 5'-TTC TGC CAG TGC CTC TTT GCT G-3' | 132       | NM_000600.5    |
| β-actin       | forward, 5'-AGG CCC AGA GCA AGA GAG G-3'         | 229       | NM_001101.5    |
| β-actin       | reverse, 5'-TAC ATG GCT GGG GTG TTG AA-3'        | 229       | NM_001101.5    |

**Table S2.** Detailed information for antibodies

| Antibody           | Source | Clonality  | Dilution | Company                   | Catalog number |
|--------------------|--------|------------|----------|---------------------------|----------------|
| NFκB p65           | Rabbit | monoclonal | 1:800    | Cell signaling technology | #8242          |
| NFκB p105/P50      | Rabbit | polyclonal | 1:400    | Abcam                     | ab7549         |
| NFκB p100/52       | Rabbit | polyclonal | 1:100    | Cell signaling technology | #4882          |
| RELB               | Rabbit | polyclonal | 1:1600   | Cell signaling technology | #10544         |
| AICDA              | Mouse  | monoclonal | 1:200    | Invitrogen                | ZA001          |
| IL-6               | Rabbit | polyclonal | 1:50     | Abcam                     | ab6672         |
| p-Jak2             | Rabbit | polyclonal | 1:100    | Abcam                     | 195055         |
| Jak2               | Rabbit | monoclonal | 1:200    | Cell signaling technology | #3230          |
| p-Stat3            | Rabbit | monoclonal | 1:200    | Cell signaling technology | #9145          |
| Stat3              | Rabbit | monoclonal | 1:400    | Cell signaling technology | #30835         |
| Cytidine deaminase | Rabbit | polyclonal | 1:200    | Abcam                     | ab78231        |

S3 Detailed H-scores by patient groups

| Group                                                  | NFκB<br>p105/P50 | NFκB<br>p65 | NFκB<br>p52/p100 | RELB | p-STAT3 | STAT3 | p-jak2 | Jak2 | il-6 | AICDA | CDA |
|--------------------------------------------------------|------------------|-------------|------------------|------|---------|-------|--------|------|------|-------|-----|
| initial<br>non-<br>T790M<br>EGFR<br>mutation<br>(n=13) | 165              | 120         | 10               | 0    | 20      | 210   | 215    | 100  | 180  | 150   | 30  |
|                                                        | 190              | 10          | 0                | 0    | 45      | 200   | 140    | 130  | 210  | 130   | 0   |
|                                                        | 180              | 180         | 0                | 5    | 0       | 0     | 160    | 100  | 65   | 160   | 0   |
|                                                        | 170              | 80          | 0                | 0    | 20      | 100   | 210    | 70   | 120  | 200   | 0   |
|                                                        | 210              | 110         | 10               | 0    | 20      | 170   | 230    | 100  | 110  | 205   | 15  |
|                                                        | 155              | 180         | 0                | 0    | 50      | 105   | 170    | 90   | 180  | 10    | 50  |
|                                                        | 140              | 190         | 0                | 0    | 5       | 160   | 120    | 30   | 130  | 130   | 60  |
|                                                        | 145              | 90          | 0                | 10   | 15      | 40    | 200    | 60   | 105  | 120   | 20  |
|                                                        | 200              | 110         | 0                | 0    | 0       | 220   | 130    | 80   | 0    | 100   | 0   |
|                                                        | 190              | 130         | 0                | 30   | 80      | 210   | 70     | 30   | 170  | 110   | 0   |
|                                                        | 100              | 150         | 0                | 30   | 120     | 180   | 90     | 0    | 140  | 220   | 0   |
|                                                        | 170              | 100         | 0                | 20   | 50      | 160   | 150    | 60   | 50   | 160   | 150 |
|                                                        | 200              | 240         | 20               | 0    | 90      | 100   | 150    | 70   | 180  | 130   | 0   |
| initial<br>T790M<br>EGFR<br>mutation<br>(n=7)          | 190              | 90          | 0                | 0    | 10      | 100   | 230    | 100  | 210  | 200   | 100 |
|                                                        | 185              | 160         | 0                | 10   | 180     | 170   | 200    | 70   | 200  | 130   | 0   |
|                                                        | 190              | 130         | 5                | 0    | 10      | 140   | 120    | 90   | 100  | 150   | 160 |
|                                                        | 200              | 210         | 0                | 10   | 30      | 210   | 200    | 100  | 40   | 200   | 30  |
|                                                        | 110              | 130         | 0                | 0    | 60      | 130   | 230    | 40   | 0    | 130   | 15  |
|                                                        | 140              | 30          | 0                | 0    | 25      | 170   | 140    | 70   | 0    | 20    | 0   |
|                                                        | 205              | 150         | 10               | 10   | 55      | 230   | 90     | 90   | 0    | 200   | 0   |
| acquired<br>T790M<br>EGFR<br>mutation<br>(n=13)        | 100              | 120         | 0                | 0    | 60      | 170   | 130    | 130  | 130  | 205   | 9   |
|                                                        | 150              | 20          | 0                | 0    | 20      | 100   | 190    | 160  | 80   | 200   | 15  |
|                                                        | 100              | 140         | 0                | 0    | 10      | 210   | 190    | 100  | 210  | 120   | 90  |
|                                                        | 205              | 300         | 0                | 0    | 85      | 250   | 215    | 0    | 130  | 210   | 0   |
|                                                        | 120              | 220         | 0                | 5    | 150     | 210   | 95     | 0    | 110  | 200   | 60  |
|                                                        | 120              | 160         | 20               | 0    | 0       | 30    | 215    | 150  | 120  | 200   | 0   |
|                                                        | 200              | 300         | 0                | 0    | 30      | 300   | 220    | 130  | 150  | 200   | 0   |
|                                                        | 130              | 220         | 10               | 0    | 80      | 270   | 210    | 100  | 170  | 120   | 10  |
|                                                        | 200              | 90          | 0                | 0    | 90      | 140   | 220    | 150  | 200  | 200   | 130 |
|                                                        | 180              | 200         | 20               | 0    | 110     | 130   | 220    | 70   | 190  | 200   | 15  |
|                                                        | 170              | 200         | 0                | 0    | 130     | 140   | 210    | 80   | 165  | 200   | 0   |
|                                                        | 205              | 10          | 0                | 10   | 70      | 0     | 190    | 30   | 180  | 200   | 0   |
|                                                        | 180              | 100         | 0                | 0    | 10      | 70    | 135    | 0    | 170  | 200   | 0   |
