# Supplementary material for: Cosuppression of NF-κB and AICDA Overcomes Acquired EGFR-TKI Resistance in Non-Small Cell Lung Cancer
Source: MDPI journal article supplement (doi:10.3390/cancers14122940), 2022-06-14

**Figure S2A.** Uncropped western blot films for Figure1A

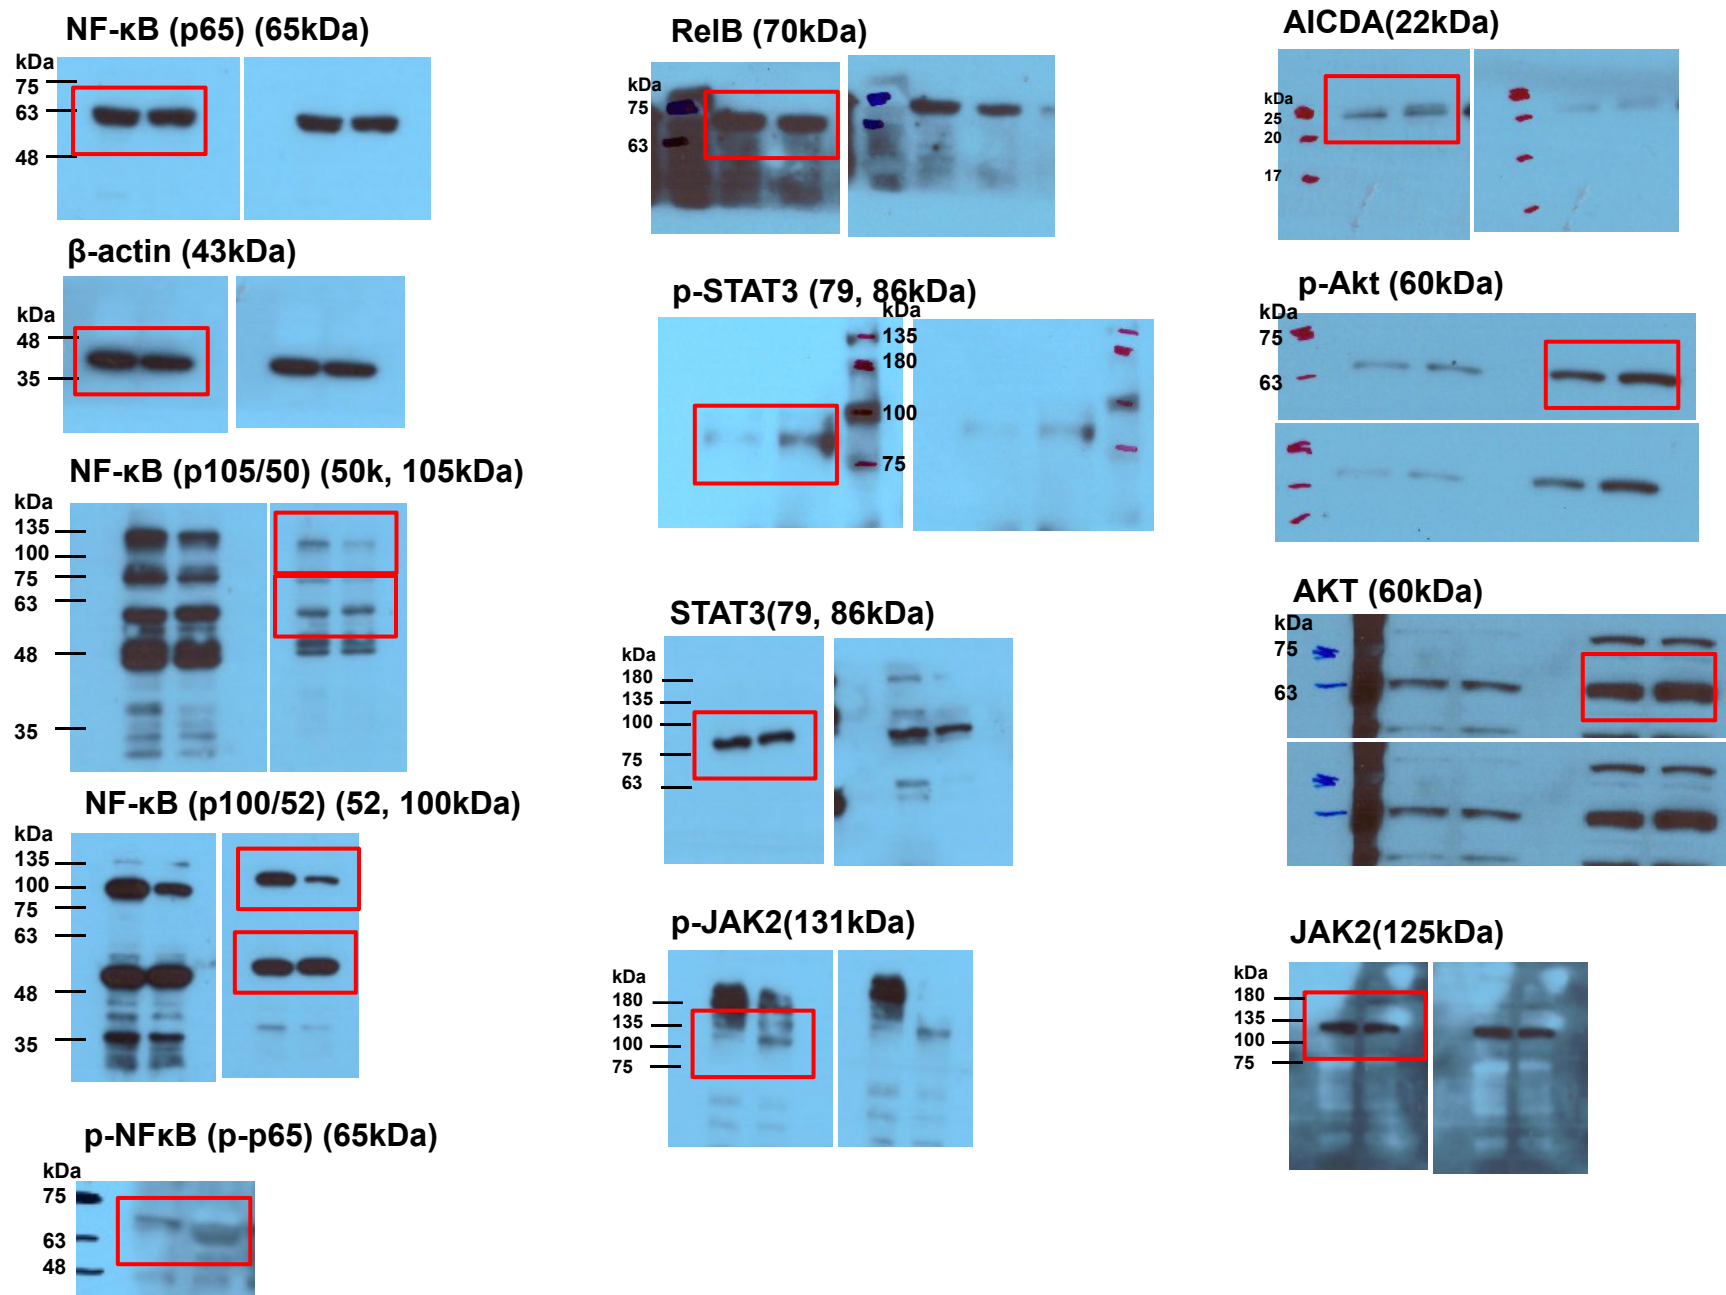

**Figure S2B.** Uncropped western blot films for Figure1B

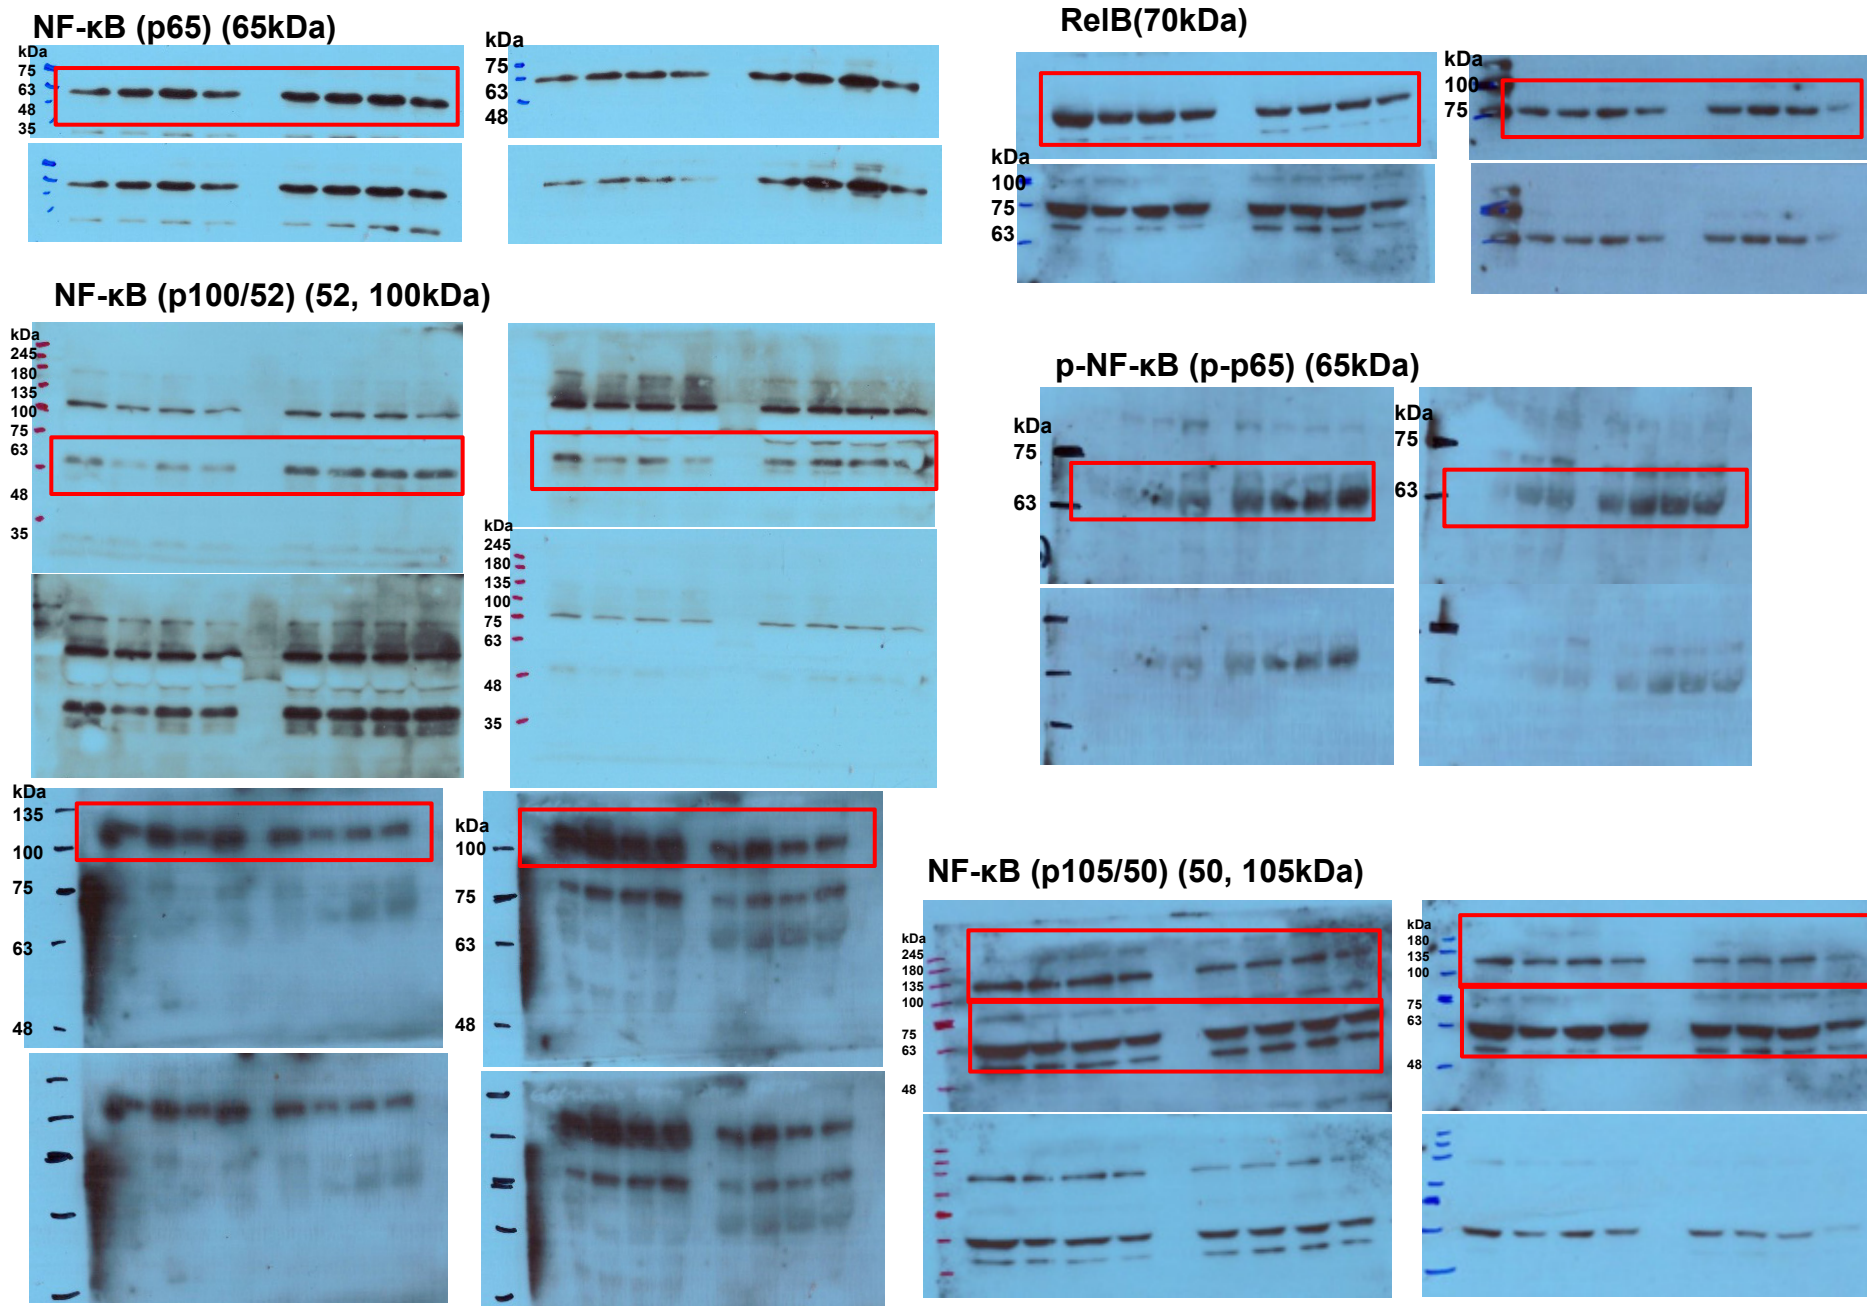



**Figure S2C.** Uncropped western blot films for Figure1C

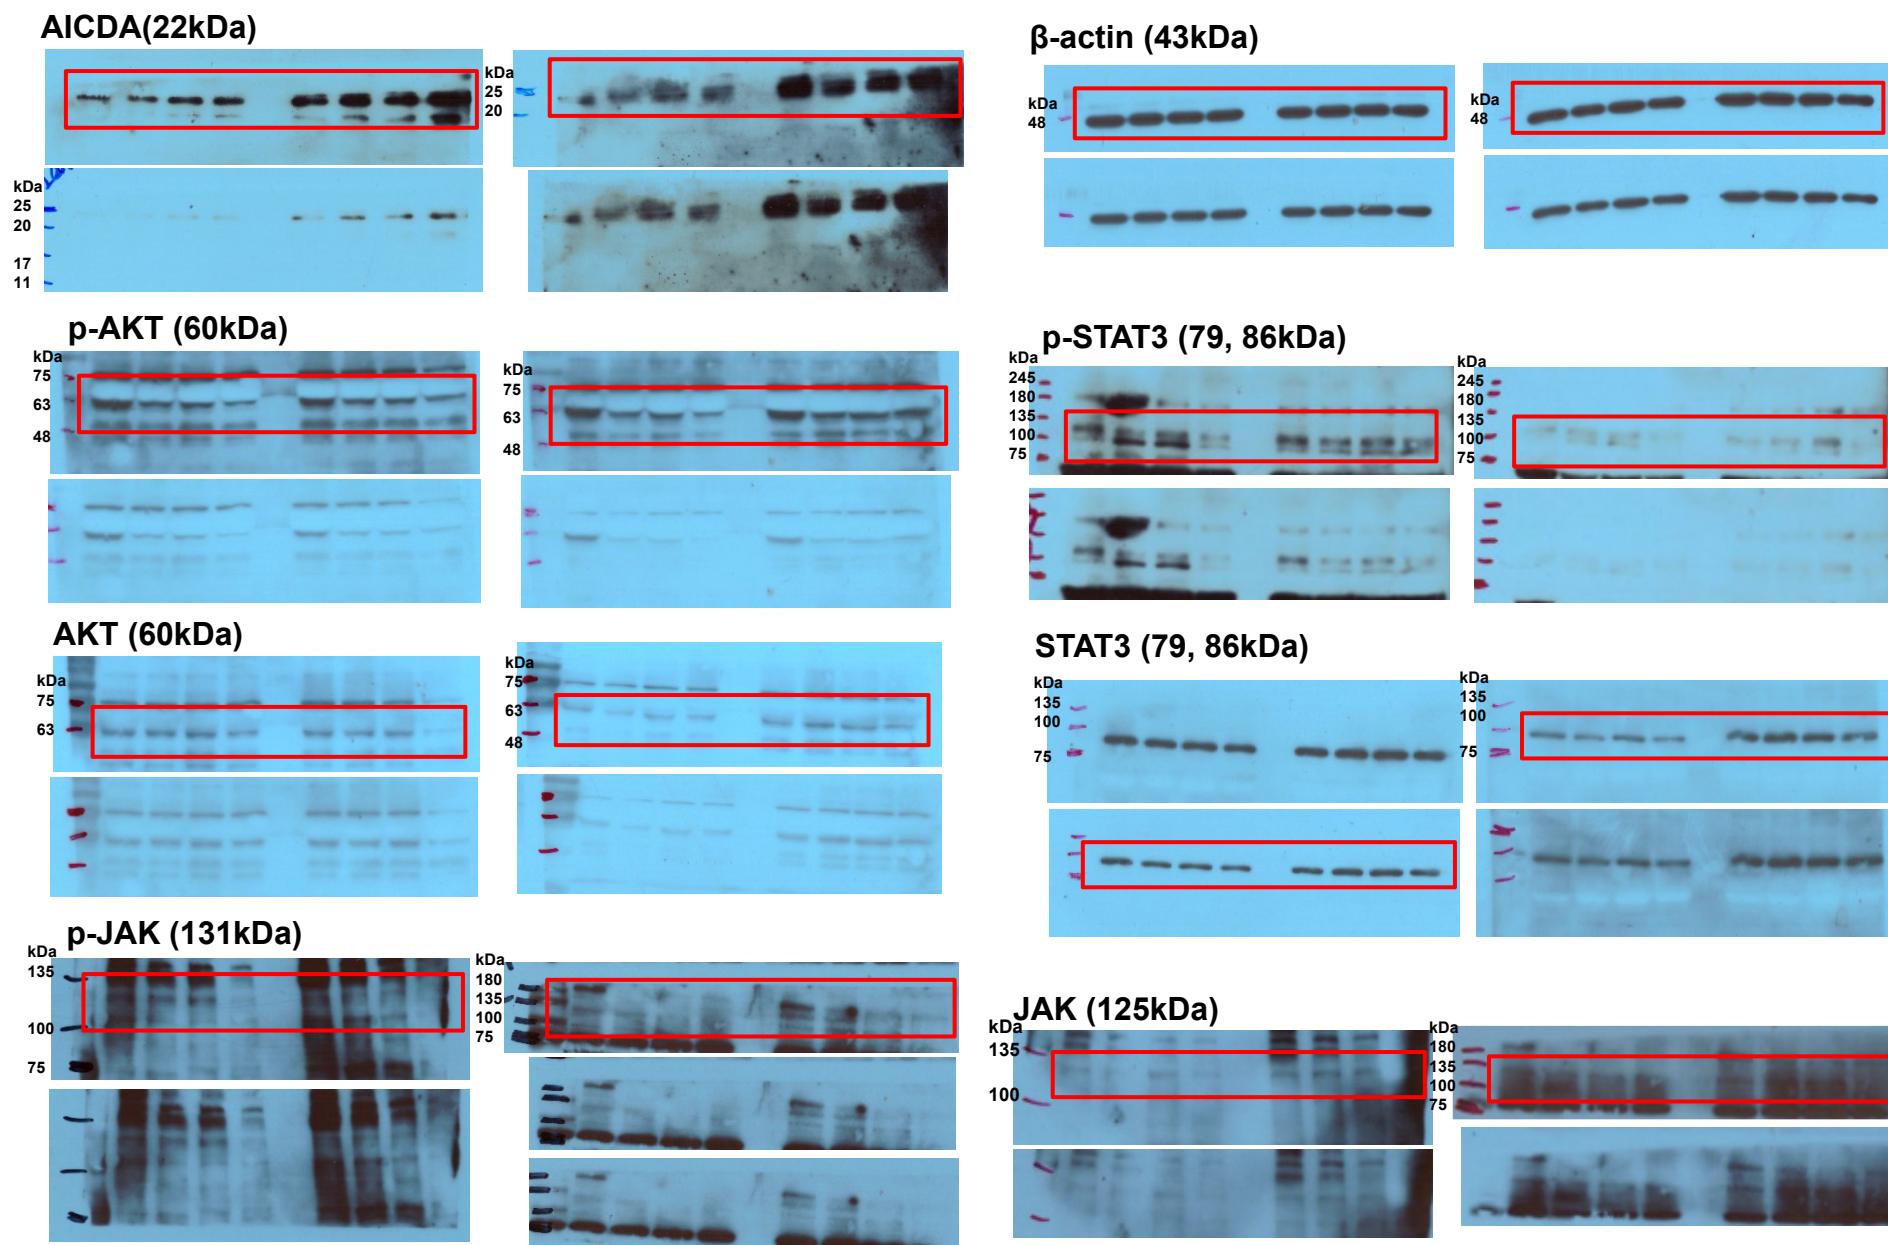

**Figure S2D.** Uncropped western blot films for Figure2A

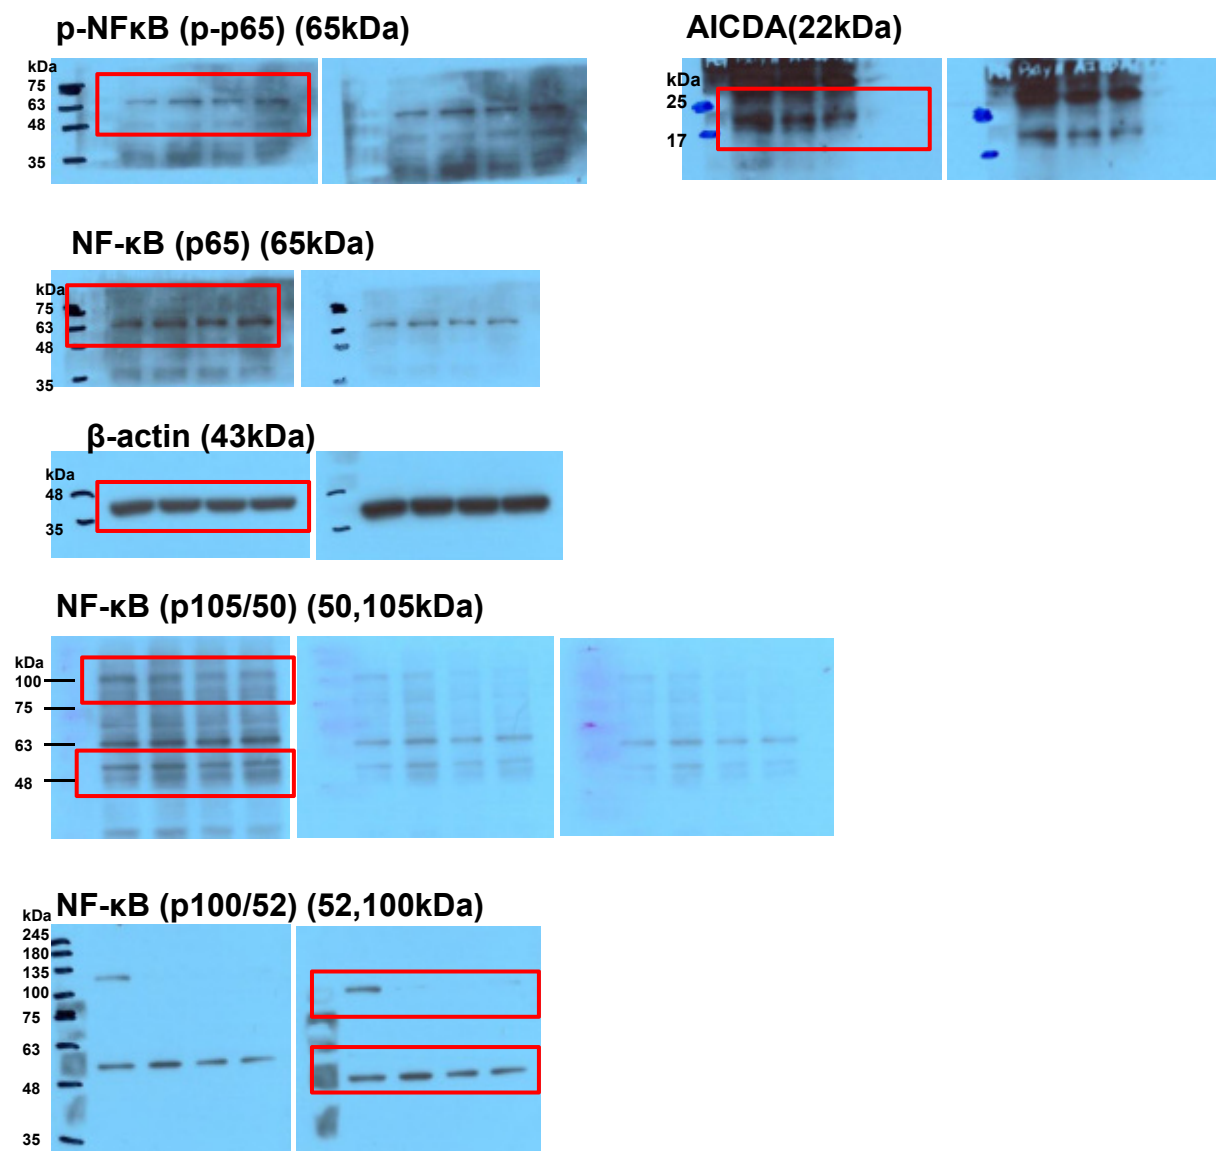

**Figure S2E.** Uncropped western blot films for Figure2C

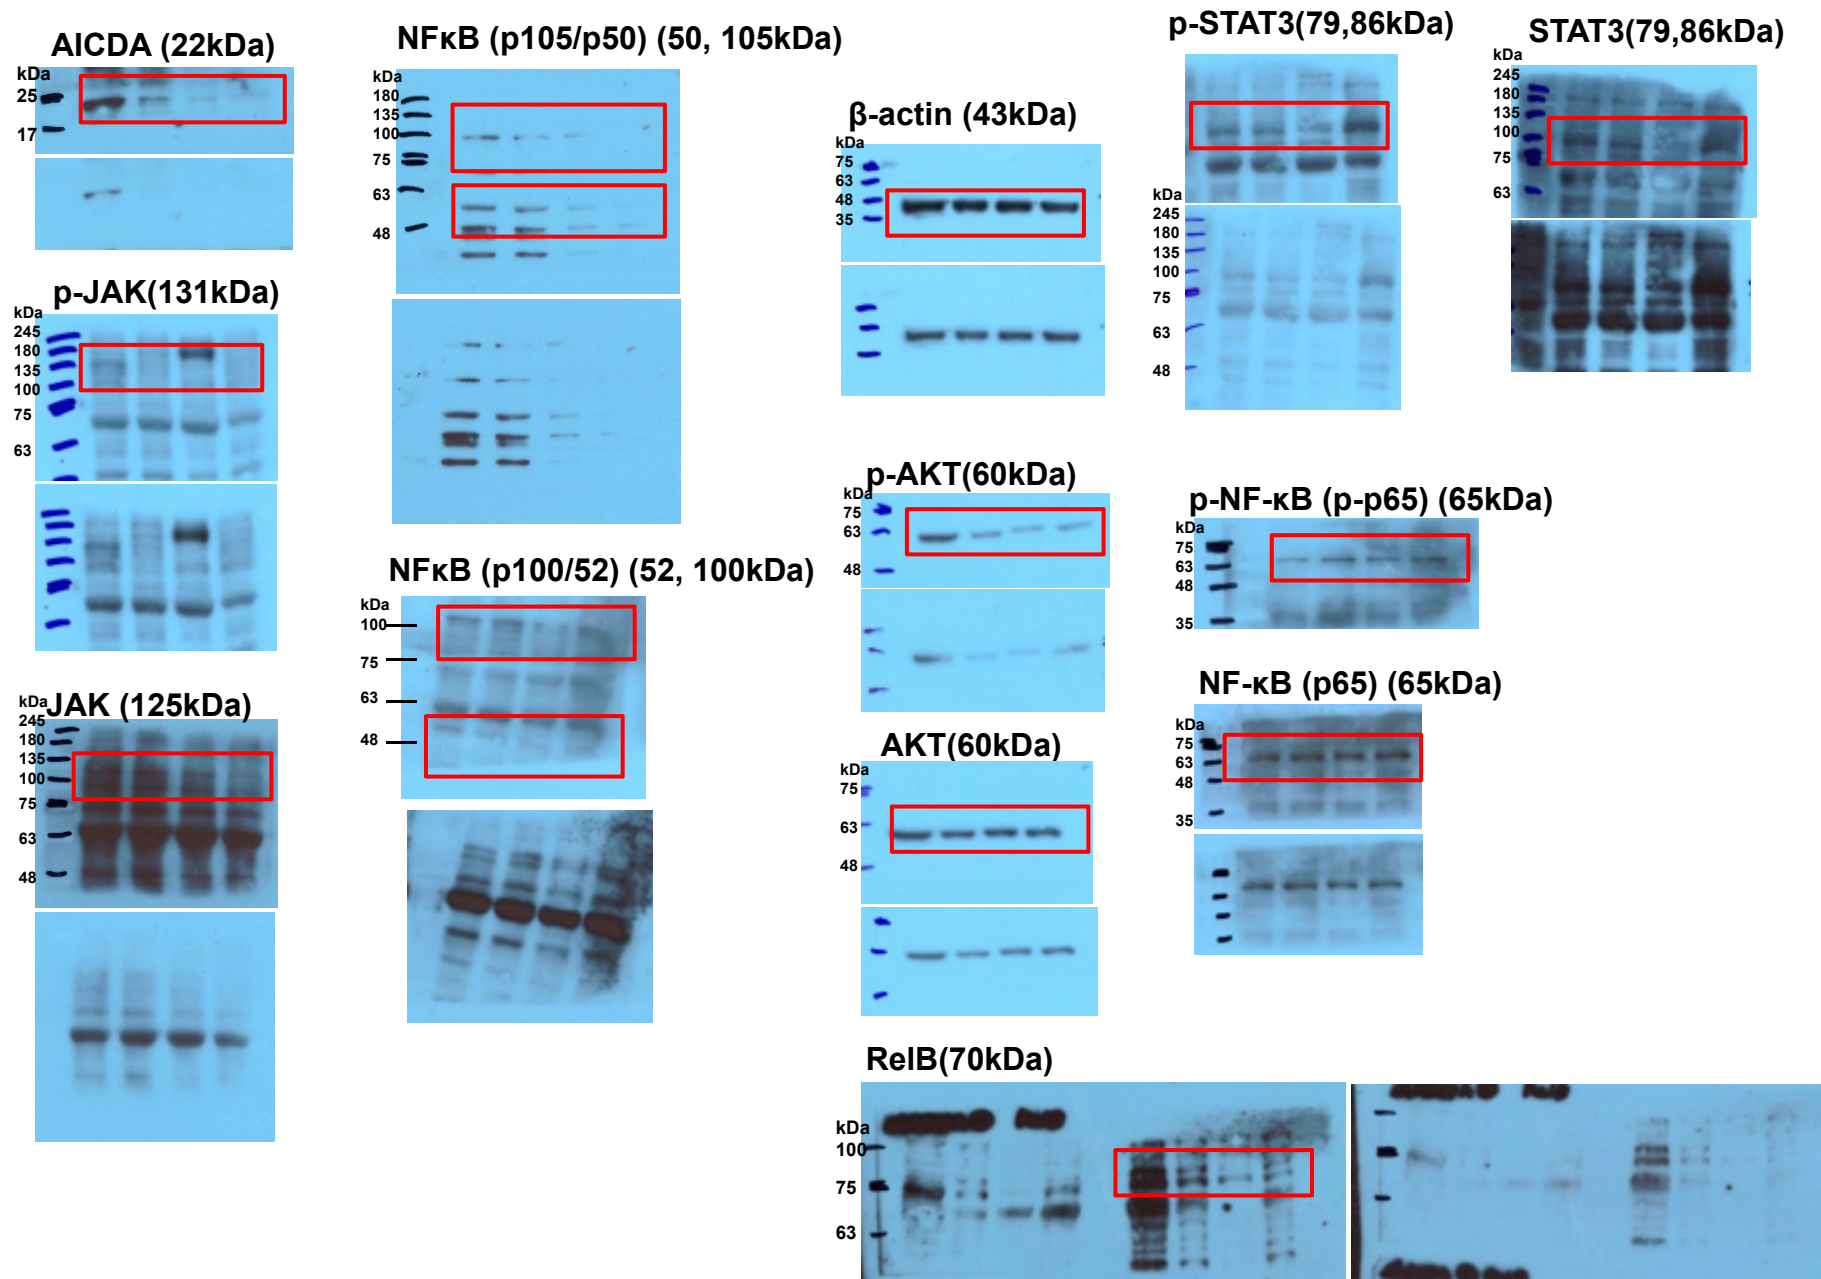



**Figure S2F.** Uncropped western blot films for Figure3B

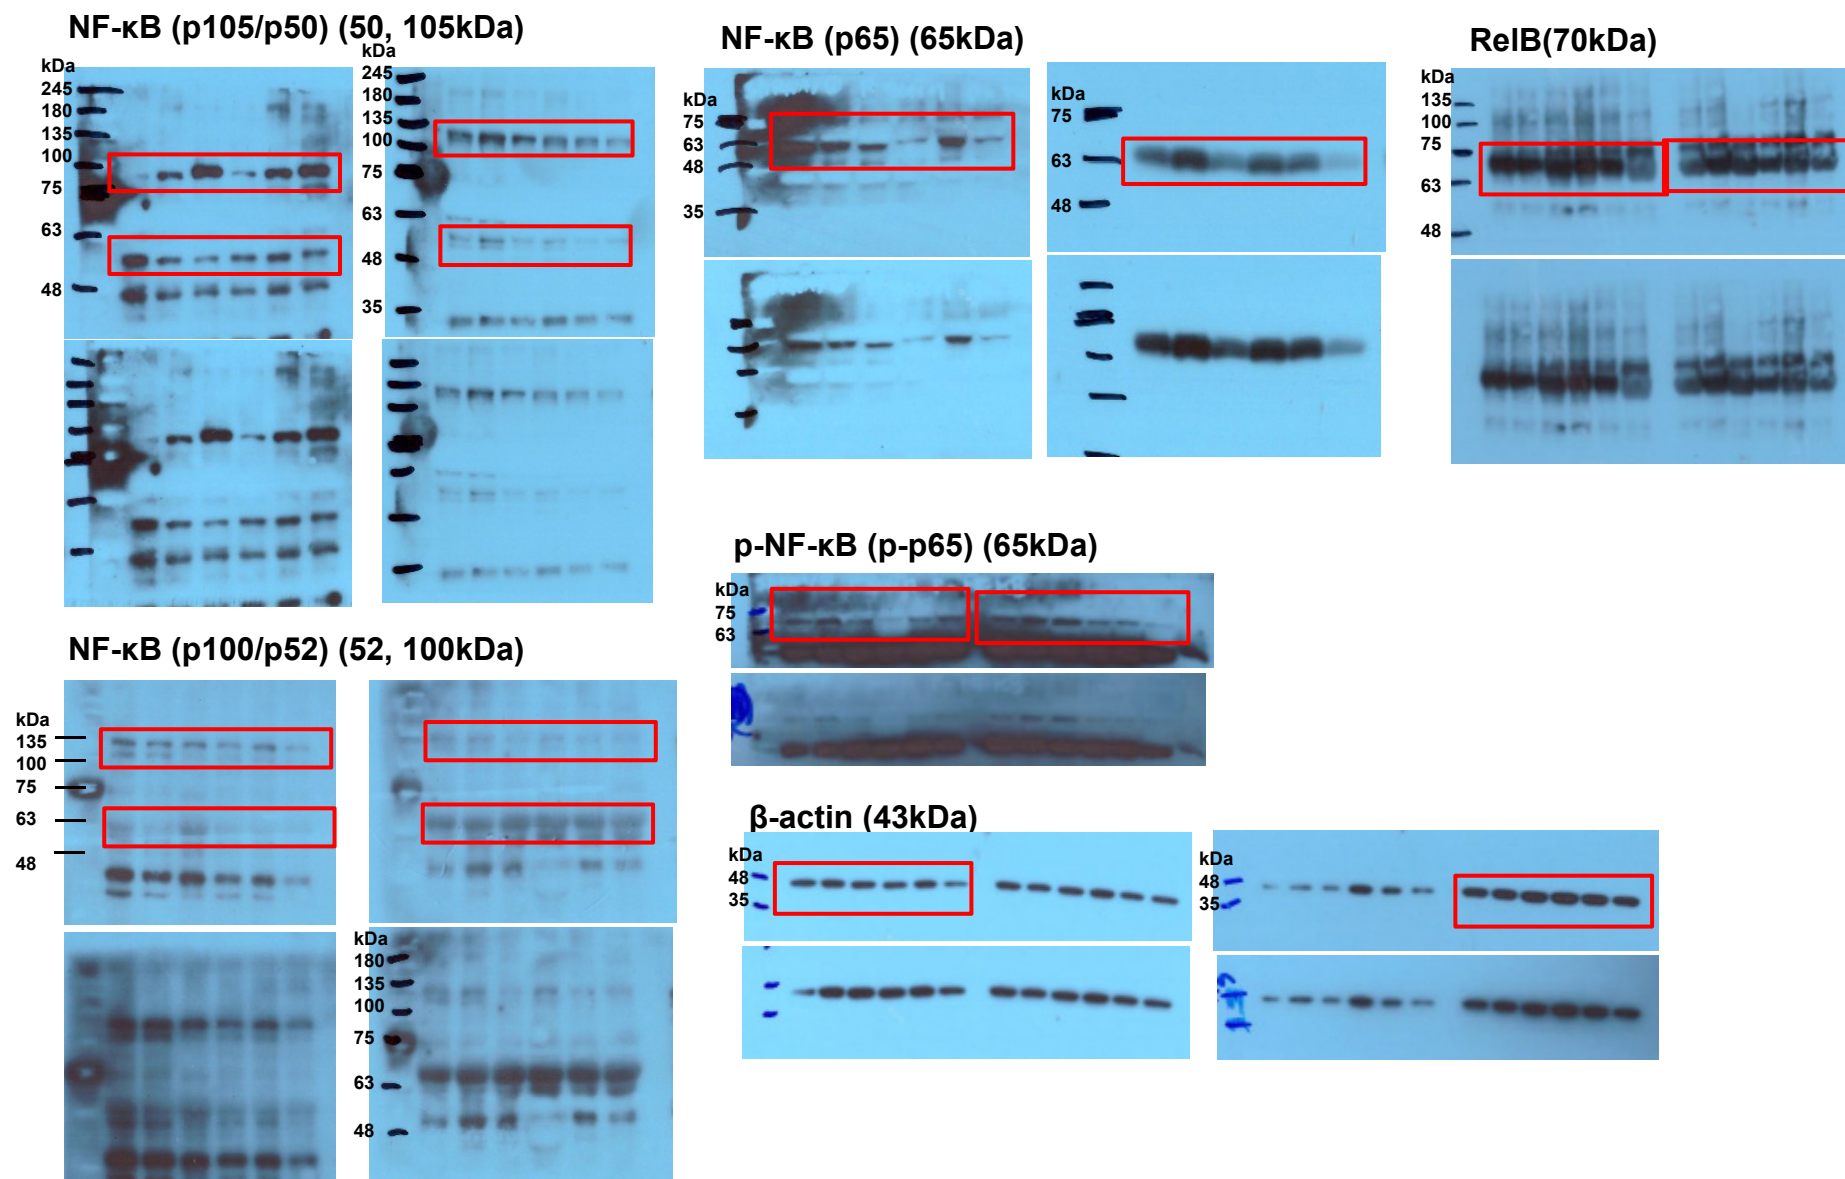

**Figure S2G.** Uncropped western blot films for Figure 3C

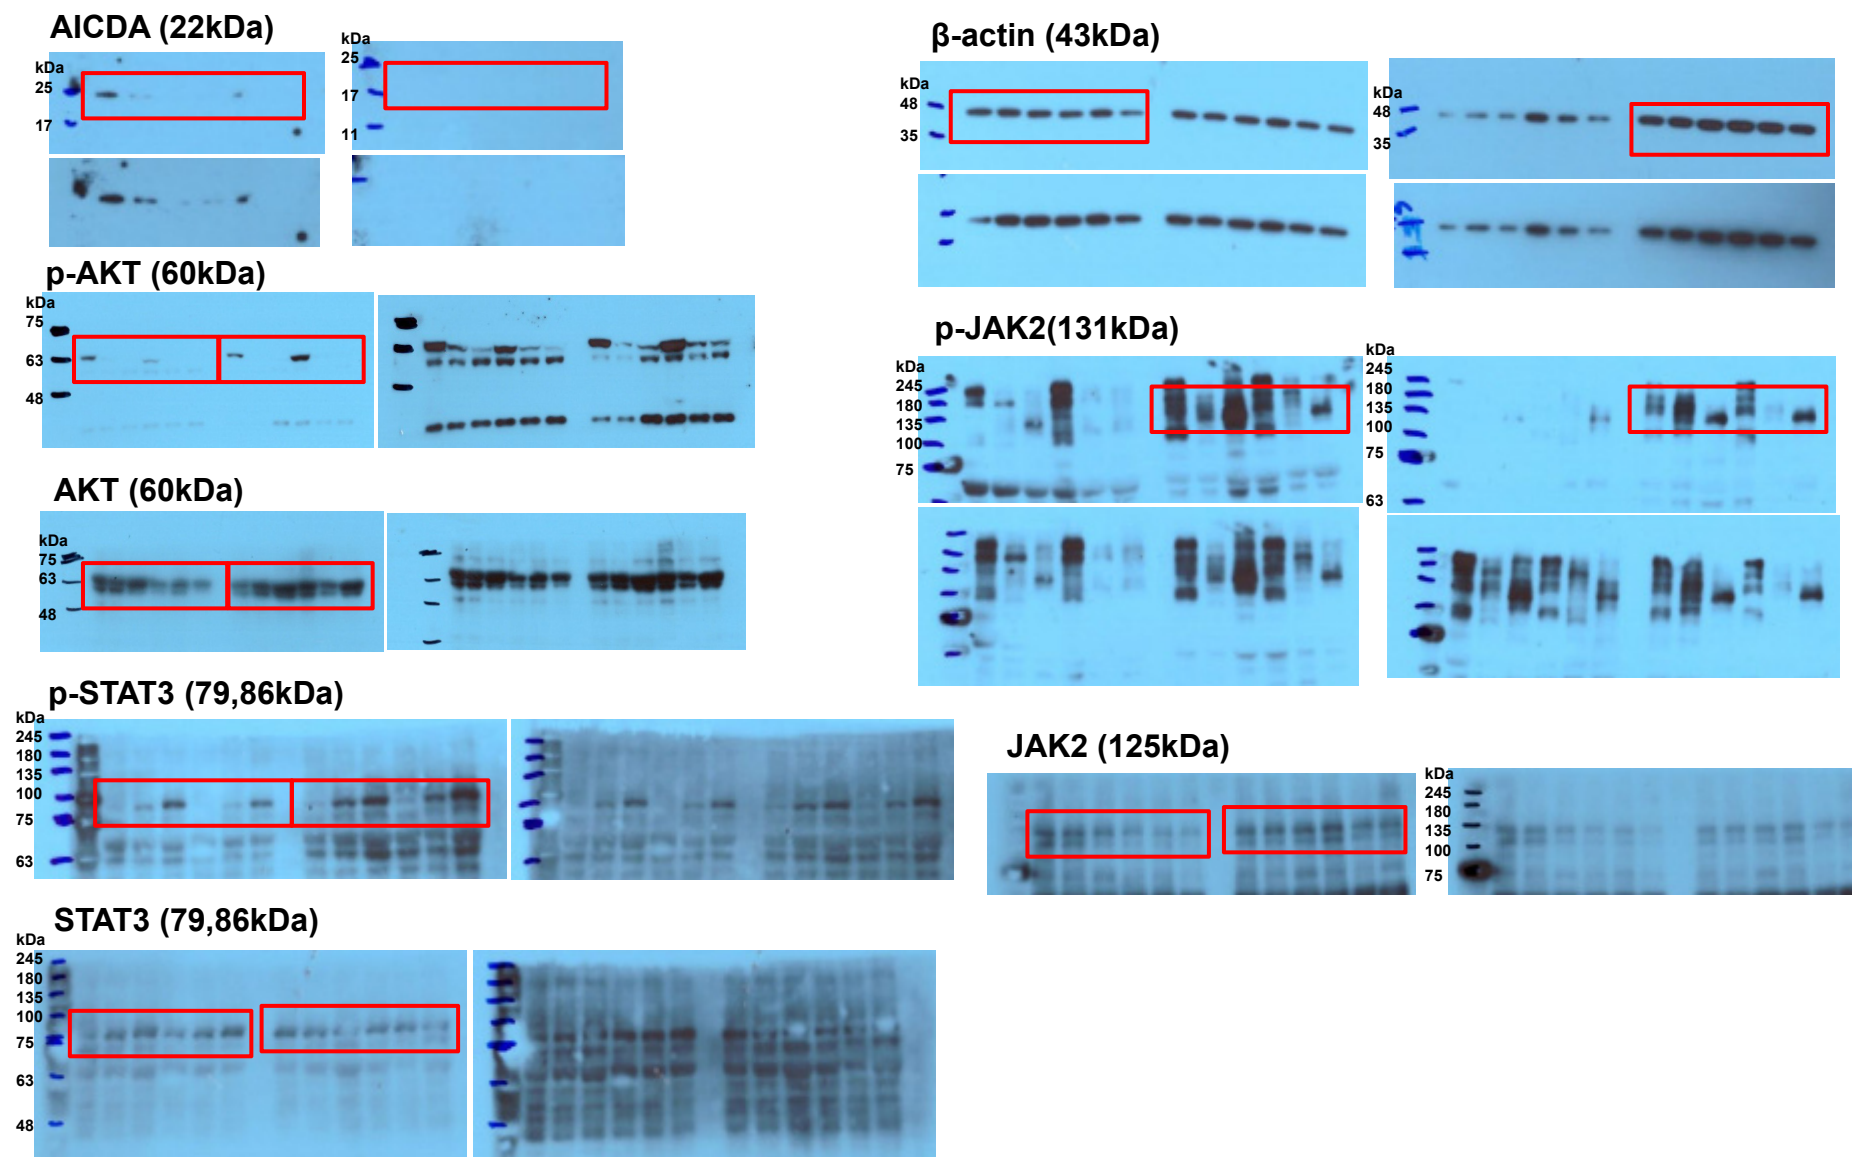

Supplement: s1 [file s1]
