# Supplementary material for: Cosuppression of NF-κB and AICDA Overcomes Acquired EGFR-TKI Resistance in Non-Small Cell Lung Cancer
Source: Cancers (Basel). 2022 Jun 14;14(12):2940. doi: 10.3390/cancers14122940 (PMC9221089; doi:10.3390/cancers14122940)
Supplement: Supplementary file 1 [file cancers-14-02940-s001.zip]

Archive with 4 entries (4 files):
- Figure S1.pdf
- Figure S2.pdf
- Figure S3 and Figure S4.pdf
- Table S1 and Table S2.pdf
