# Supplementary figures and images for: Cosuppression of NF-κB and AICDA Overcomes Acquired EGFR-TKI Resistance in Non-Small Cell Lung Cancer
Source: MDPI journal article supplement (doi:10.3390/cancers14122940), 2022-06-14

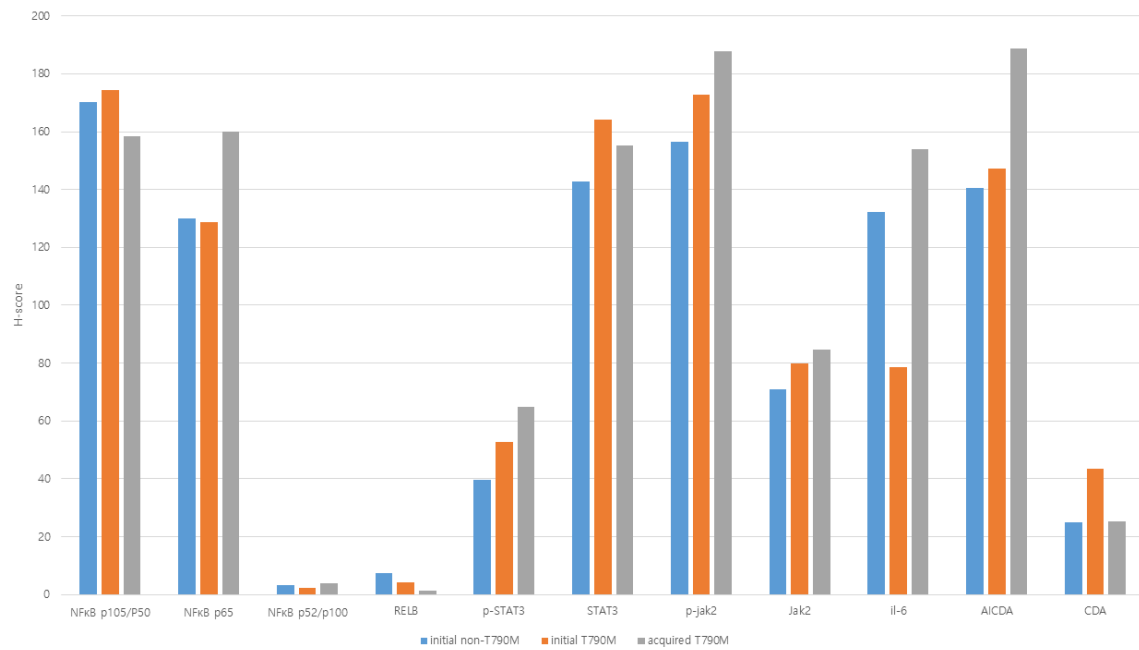

**Figure S3.** Immunologic results by patient groups.

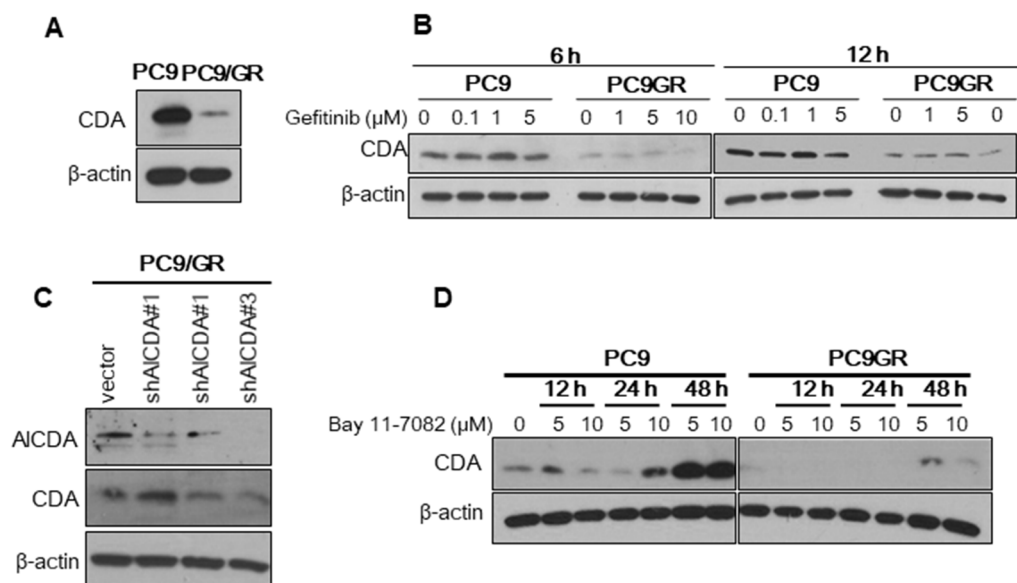

**Figure S4.** Western blot analysis of CDA.

Supplement: s1 [file s1]
